# Supplementary material for: A New Antimicrobial Phenylpropanol from the Leaves of Tabernaemontana inconspicua Stapf. (Apocynaceae) Inhibits Pathogenic Gram-Negative Bacteria
Source: MDPI journal article supplement (doi:10.3390/antibiotics11010121), 2022-01-17
Supplement: s1 [file s1]

# **A New Antimicrobial Phenylpropanol from the Leaves of *Tabernaemontana inconspicua* Stapf. (Apocynaceae)**

**Lidwine Ngah <sup>1</sup>, Willifred Dongmo Tékapi Tsopgni <sup>1</sup>, Judith Caroline Ngo Nyobe <sup>2</sup>, Alain Tadjong Tcho <sup>3</sup>, Moses K Langat <sup>4</sup>, Jean Claude Ndom <sup>1</sup>, Eduard Mas-Claret <sup>4</sup>, Nicholas John Sadgrove <sup>4</sup>, Alain François Kamdem Waffo <sup>1</sup> and Methee Phumthum <sup>4, 5, \*</sup>**

<sup>1</sup> Department of Chemistry, University of Douala, Faculty of Sciences, 24157 Douala, Cameroon

<sup>2</sup> Laboratory of Quality Control for Food, Pharmaceutical and Cosmetic Products, Department of Thermal Engineering and Energy, University Institute of Technology, University of Douala, PO Box: 8698 Douala, Cameroon

<sup>3</sup> Department of Chemistry, University of Buea, Faculty of Sciences, PO Box: 63 Buea, Cameroon

<sup>4</sup> Royal Botanic Gardens, Kew, Kew Green, Richmond, Surrey, TW9 3AE, UK

<sup>5</sup> Department of Pharmaceutical Botany, Faculty of Pharmacy, Mahidol University, Bangkok, 10400, Thailand

## Contents:

|                                                                                                           |    |
|-----------------------------------------------------------------------------------------------------------|----|
| <b>Figure S1:</b> (+)-HR-ESI spectrum of <b>1</b> .....                                                   | 2  |
| <b>Figure S2:</b> $^1\text{H}$ NMR spectrum (500 MHz) of <b>1</b> in MeOD .....                           | 2  |
| <b>Figure S3:</b> $^{13}\text{C}$ NMR spectrum (125 MHz) of <b>1</b> in MeOD .....                        | 3  |
| <b>Figure S4:</b> DEPT spectrum (125 MHz) of <b>1</b> in MeOD .....                                       | 3  |
| <b>Figure S5:</b> HMBC spectrum of <b>1</b> in MeOD .....                                                 | 3  |
| <b>Figure S6:</b> NOESY spectrum of <b>1</b> in MeOD .....                                                | 4  |
| <b>Figure S7:</b> $^1\text{H}$ NMR spectrum (500 MHz) of <b>2</b> in MeOD .....                           | 4  |
| <b>Figure S8:</b> $^1\text{H}$ - $^1\text{H}$ COSY spectrum of <b>2</b> in MeOD .....                     | 5  |
| <b>Figure S9:</b> $^{13}\text{C}$ NMR spectrum (125 MHz) of <b>1</b> in MeOD .....                        | 5  |
| <b>Figure S10:</b> DEPT spectrum (125 MHz) of <b>1</b> in MeOD .....                                      | 6  |
| <b>Figure S11:</b> HMBC spectrum of <b>2</b> in MeOD .....                                                | 6  |
| <b>Figure S12:</b> $^1\text{H}$ NMR spectrum (500 MHz) of <b>3</b> in MeOD .....                          | 7  |
| <b>Figure S13:</b> $^1\text{H}$ - $^1\text{H}$ COSY spectrum of <b>3</b> in MeOD .....                    | 7  |
| <b>Figure S14:</b> $^{13}\text{C}$ NMR spectrum (125 MHz) of <b>3</b> in MeOD .....                       | 8  |
| <b>Figure S15:</b> DEPT spectrum (125 MHz) of <b>3</b> in MeOD .....                                      | 8  |
| <b>Figure S16:</b> HMBC spectrum of <b>3</b> in MeOD .....                                                | 9  |
| <b>Figure S17:</b> $^1\text{H}$ NMR spectrum (500 MHz) of <b>4</b> in MeOD .....                          | 9  |
| <b>Figure S18:</b> DEPT spectrum (125 MHz) of <b>4</b> in MeOD .....                                      | 10 |
| <b>Figure S19:</b> HMBC spectrum of <b>4</b> in MeOD .....                                                | 10 |
| <b>Figure S20:</b> $^1\text{H}$ NMR spectrum (500 MHz) of <b>5</b> in MeOD .....                          | 11 |
| <b>Figure S21:</b> HMBC spectrum of <b>5</b> in MeOD .....                                                | 11 |
| <b>Figure S22:</b> $^1\text{H}$ NMR spectrum (500 MHz) of <b>6</b> in $\text{CDCl}_3$ .....               | 12 |
| <b>Figure S23:</b> $^1\text{H}$ NMR spectrum (500 MHz) of <b>7</b> in MeOD .....                          | 12 |
| <b>Figure S24:</b> $^1\text{H}$ NMR spectrum (500 MHz) of <b>8</b> and <b>10</b> in $\text{CDCl}_3$ ..... | 13 |
| <b>Figure S25:</b> $^1\text{H}$ NMR spectrum (500 MHz) of <b>9</b> in $\text{CDCl}_3$ / MeOD .....        | 13 |

D:\Xcalibur\...\Berset TBC1\_210803153951 8/4/2021 8:39:44 AM Berset TBC1  
 NSI pos MeOH  
 Berset TBC1\_210803153951 #33-42 RT: 1.14-1.39 AV: 10 NL: 2.05E7  
 T: FTMS + p NSI Full ms [80.00-500.00]

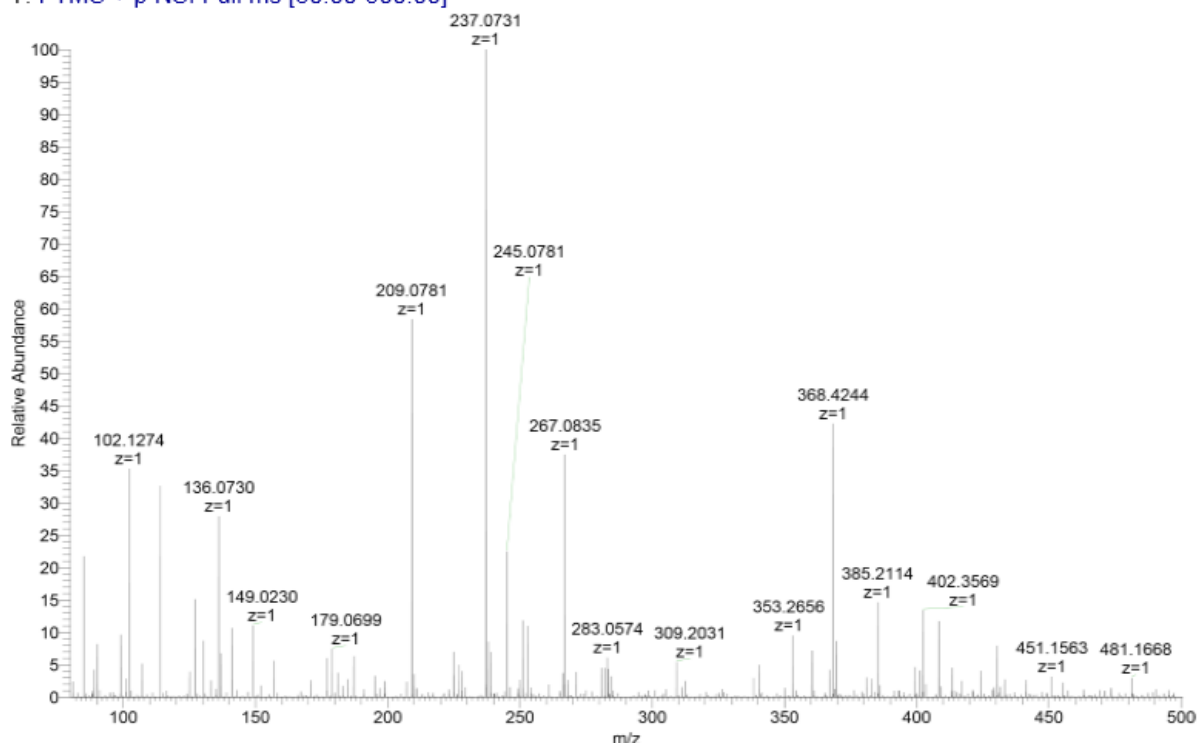

**Figure S1:**  $^1\text{H}$  NMR spectrum (500 MHz) of **1** in MeOD

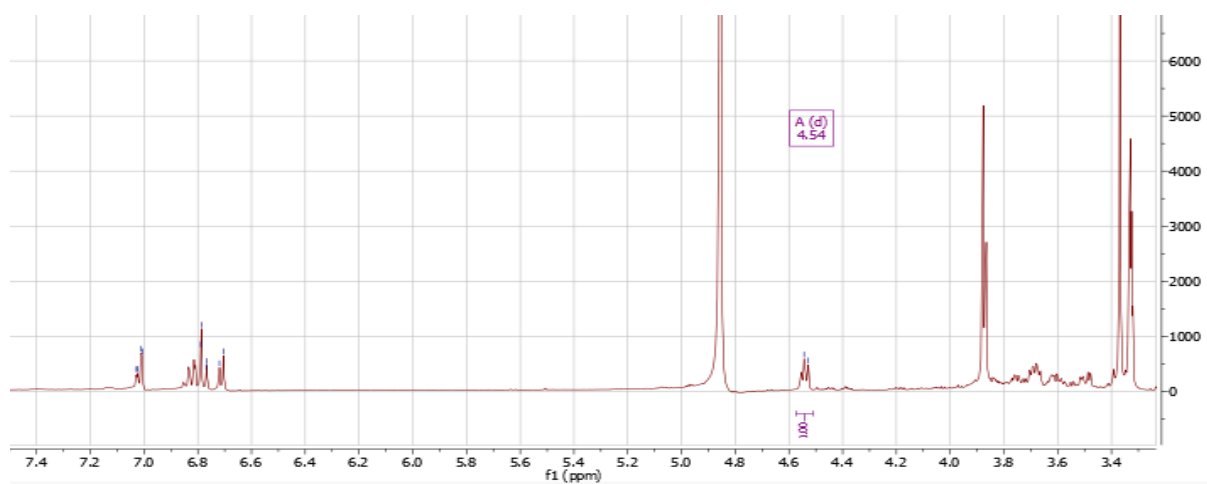

**Figure S2:**  $^1\text{H}$  NMR spectrum (500 MHz) of **1** in MeOD

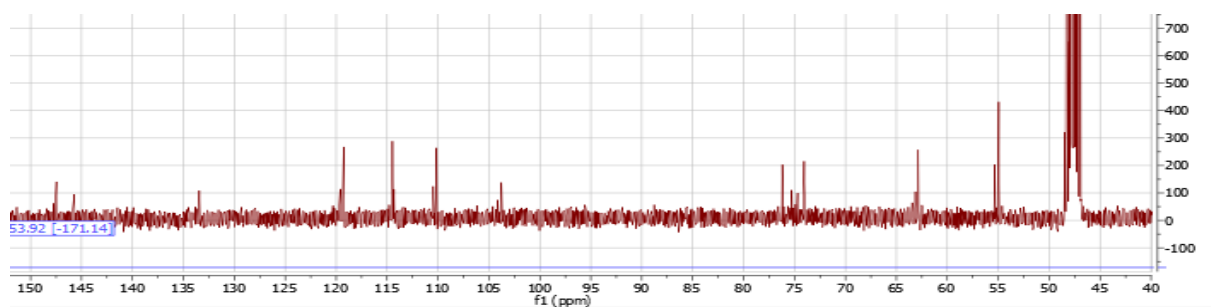

**Figure S3:**  $^{13}\text{C}$  NMR spectrum (125 MHz) of **1** in MeOD

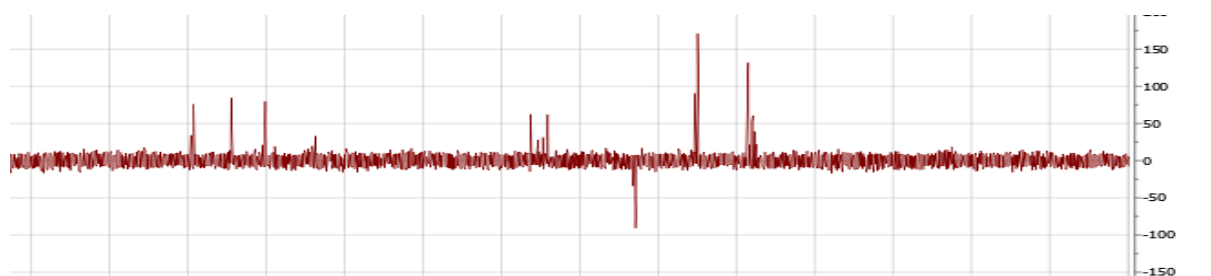

**Figure S4:** DEPT 135 spectrum (125 MHz) of **1** in MeOD

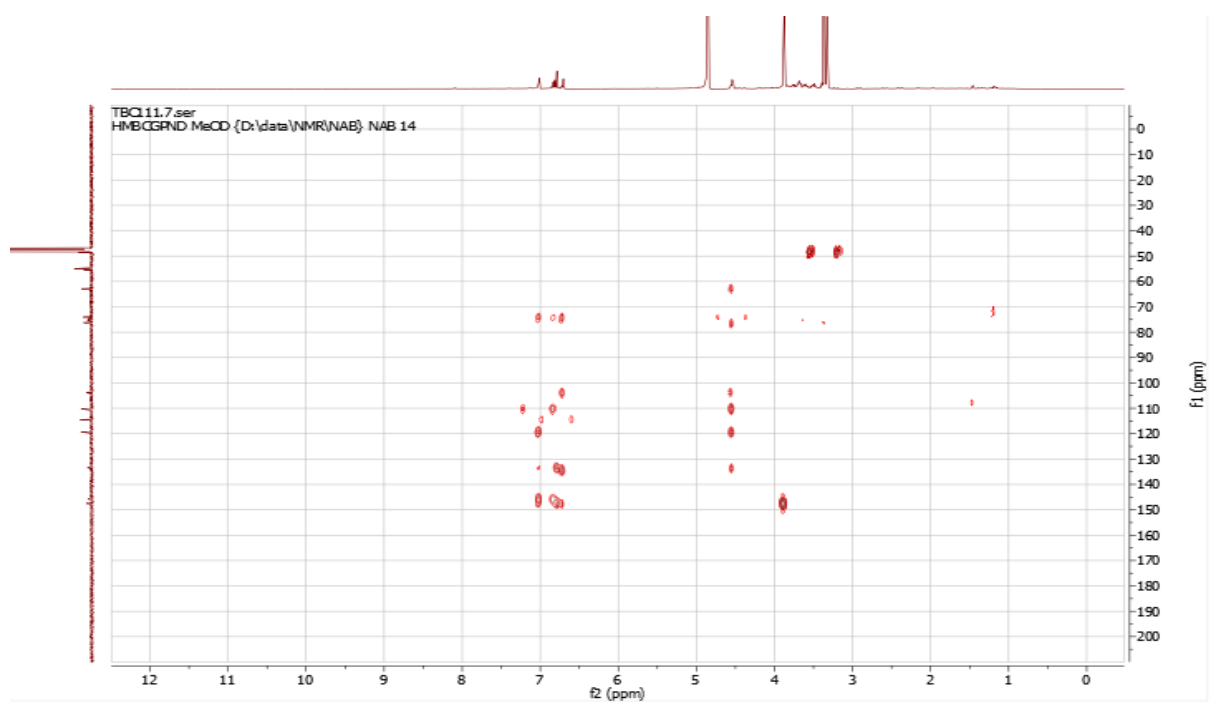

**Figure S5:** HMBC spectrum of **1** in MeOD

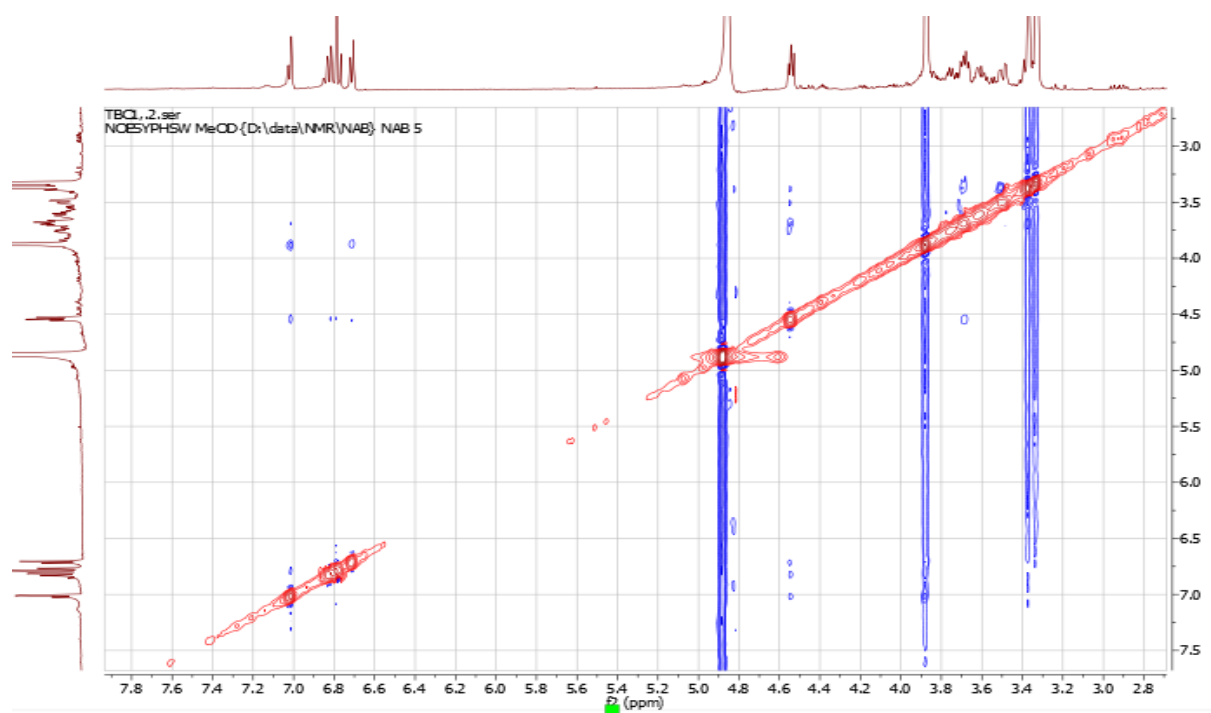

**Figure S6:** HMBC spectrum of **1** in MeOD

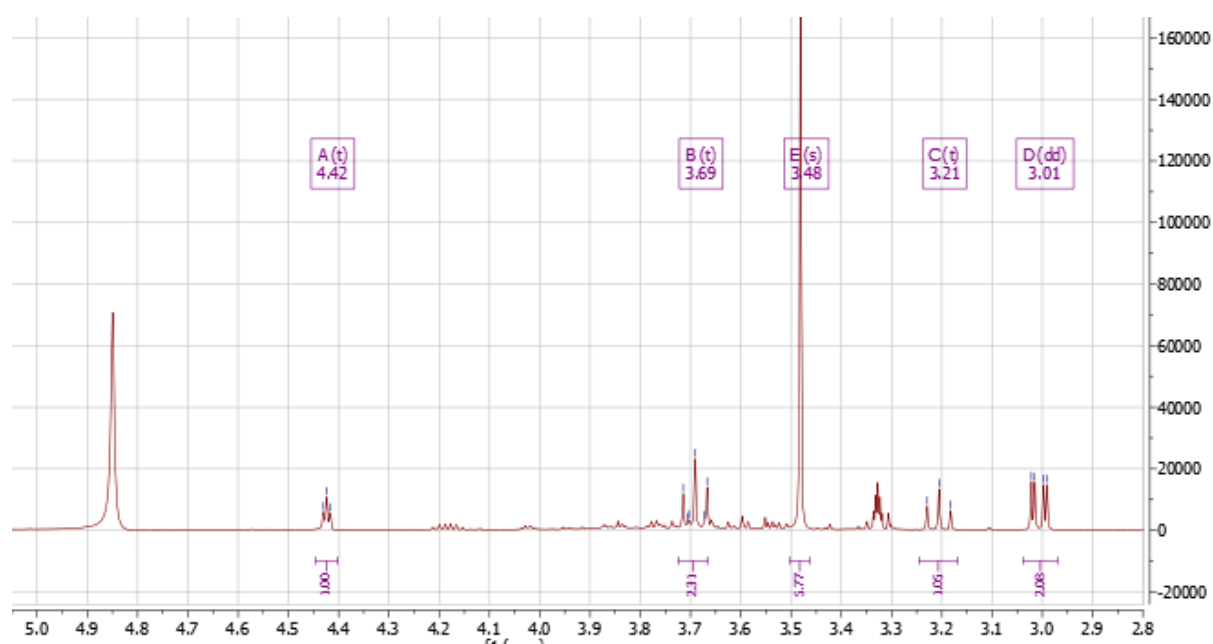

**Figure S7:**  $^1\text{H}$  NMR spectrum (500 MHz) of **2** in MeOD

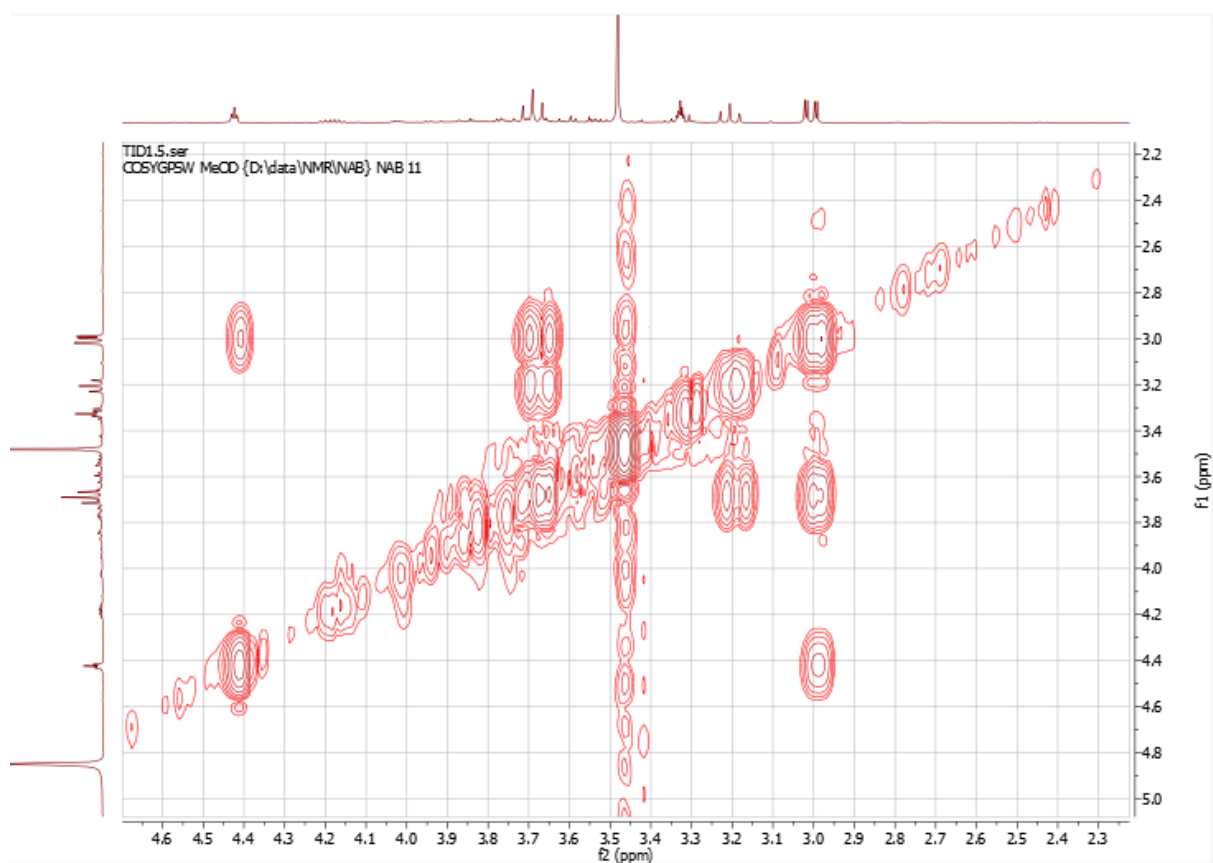

**Figure S8:** COSY  $^1\text{H}$ - $^1\text{H}$  spectrum (500 MHz) of **2** in MeOD

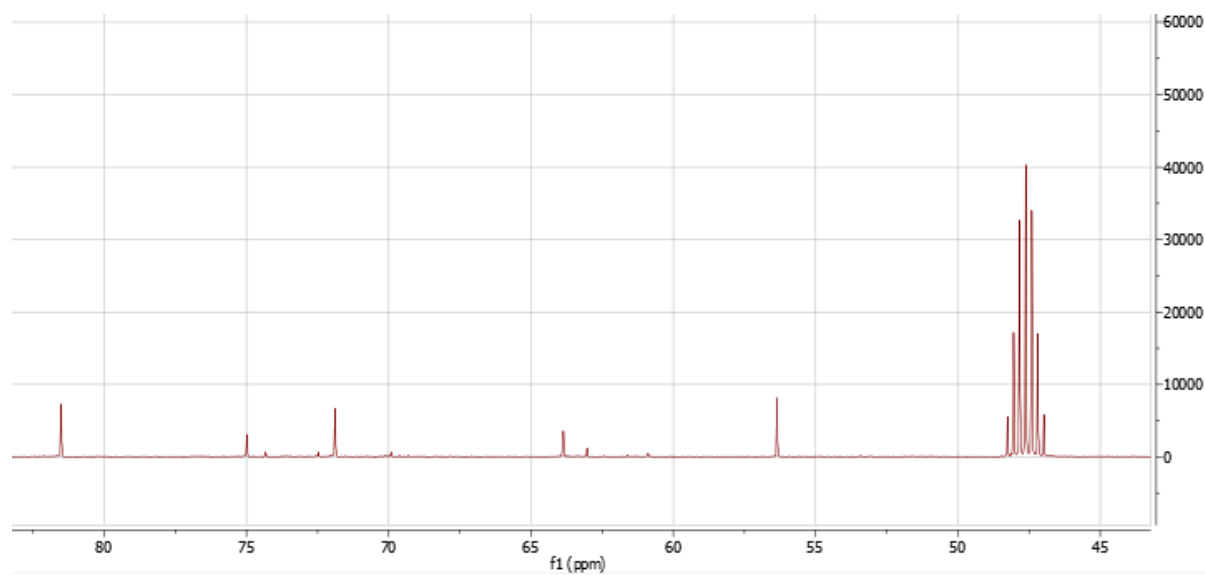

**Figure S9:**  $^{13}\text{C}$  NMR spectrum (125 MHz) of **2** in MeOD

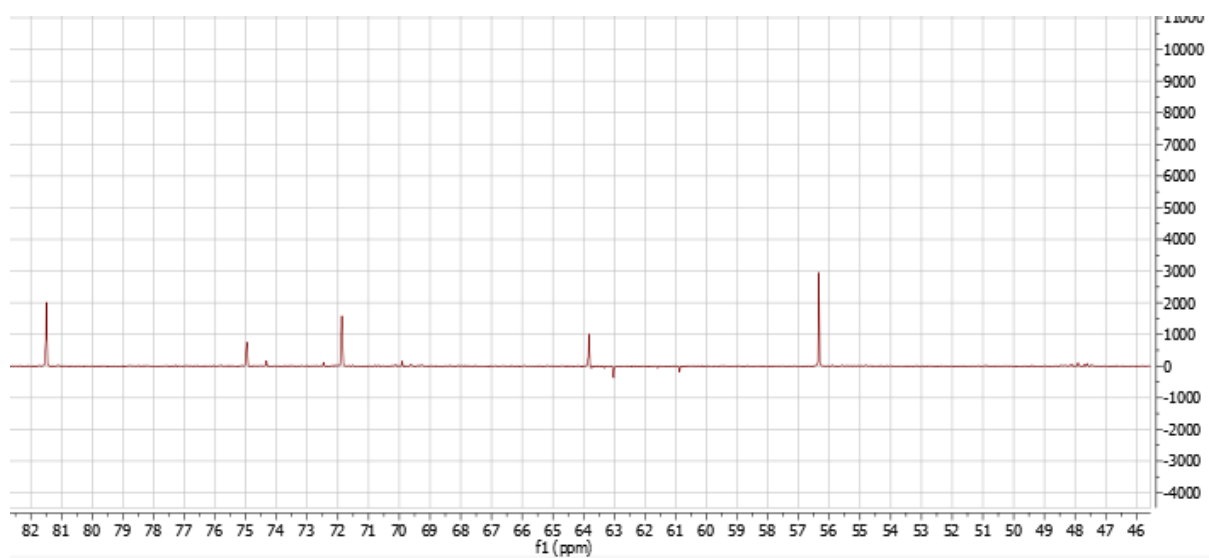

Figure S10: DEPT 135 spectrum (125 MHz) of **2** in MeOD

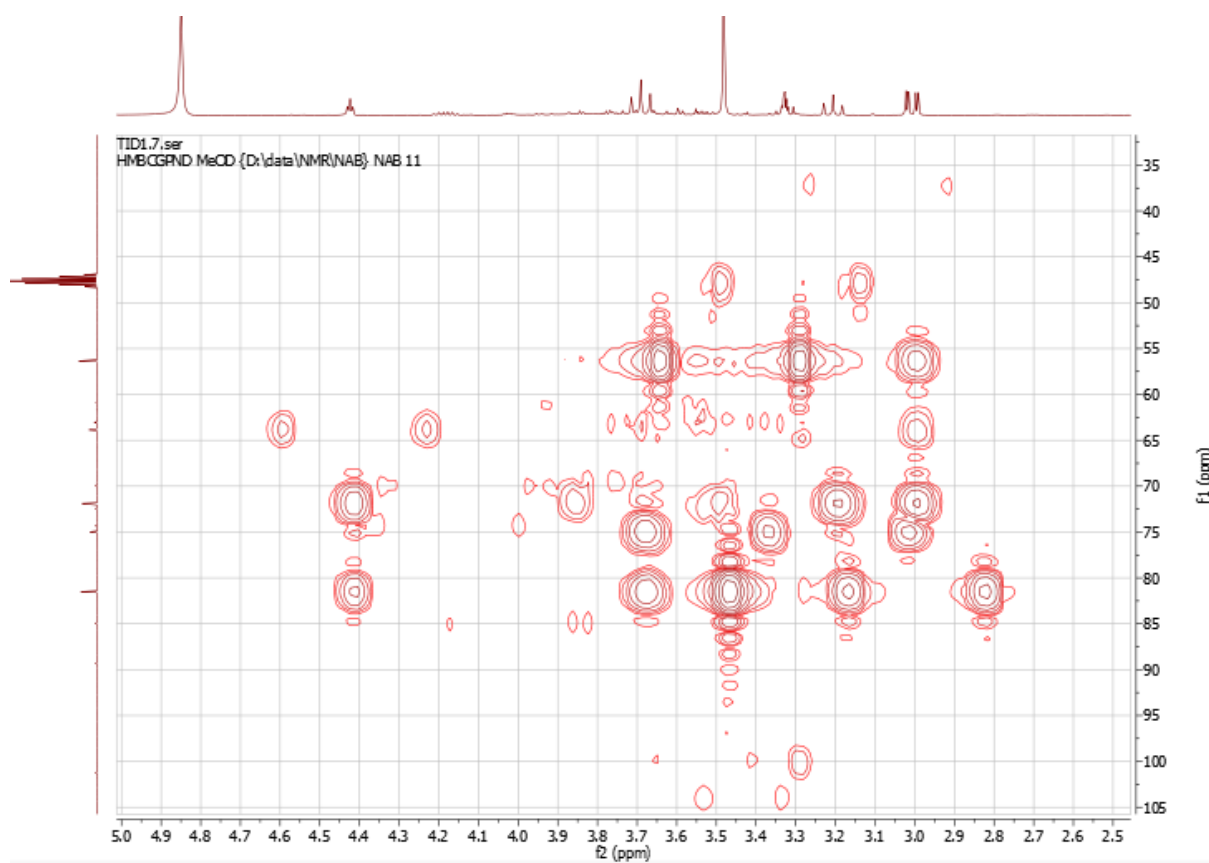

Figure S11: HMBC spectrum of **2** in MeOD

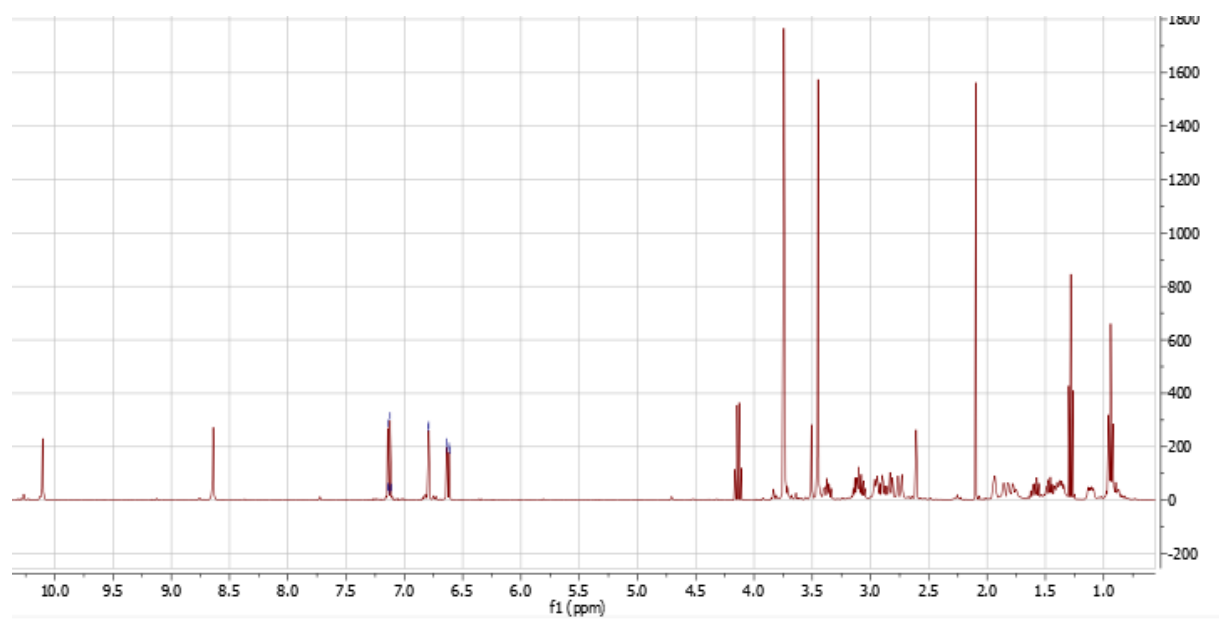

**Figure S12:**  $^1\text{H}$  NMR spectrum (500 MHz) of **3** in MeOD

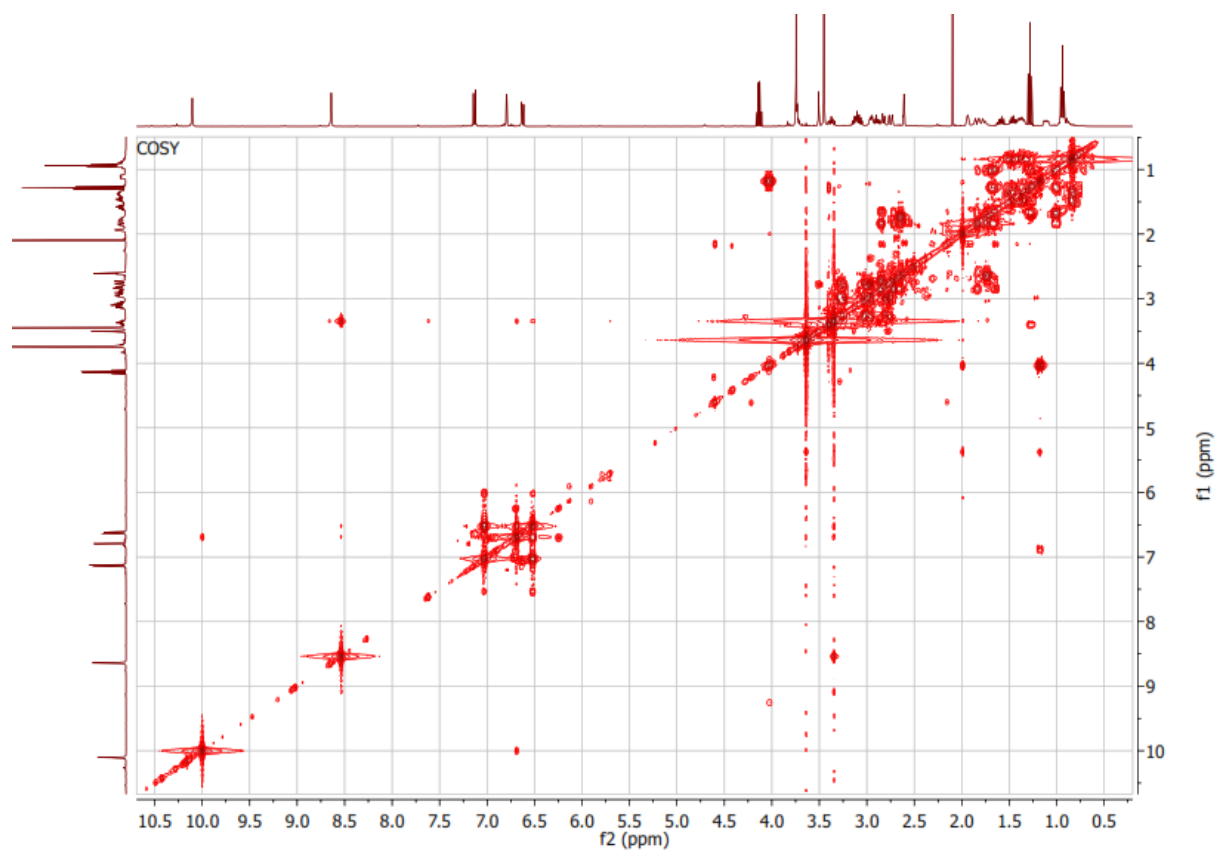

**Figure S13:** COSY  $^1\text{H}$ - $^1\text{H}$  spectrum (500 MHz) of **3** in MeOD



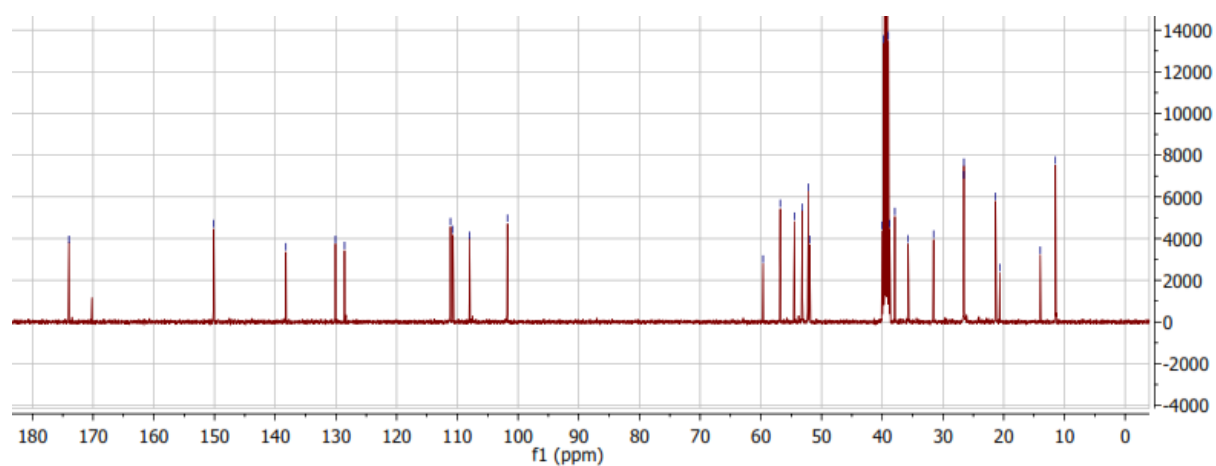

**Figure S14:**  $^{13}\text{C}$  NMR spectrum (125 MHz) of 3 in MeOD

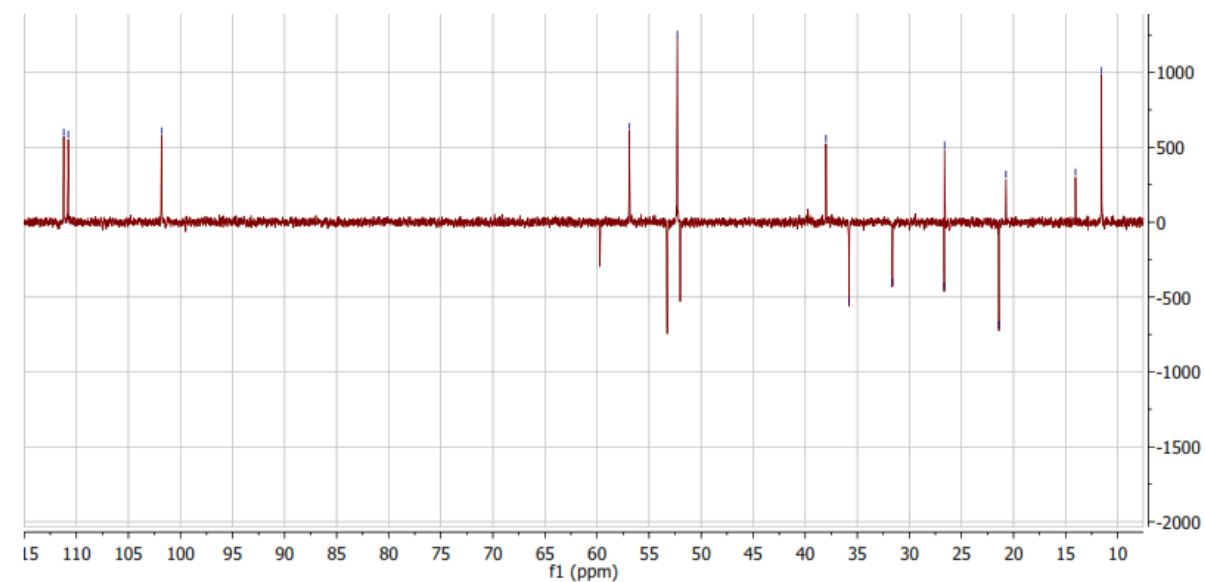

**Figure S15:**  $^{13}\text{C}$  NMR spectrum (125 MHz) of 3 in MeOD

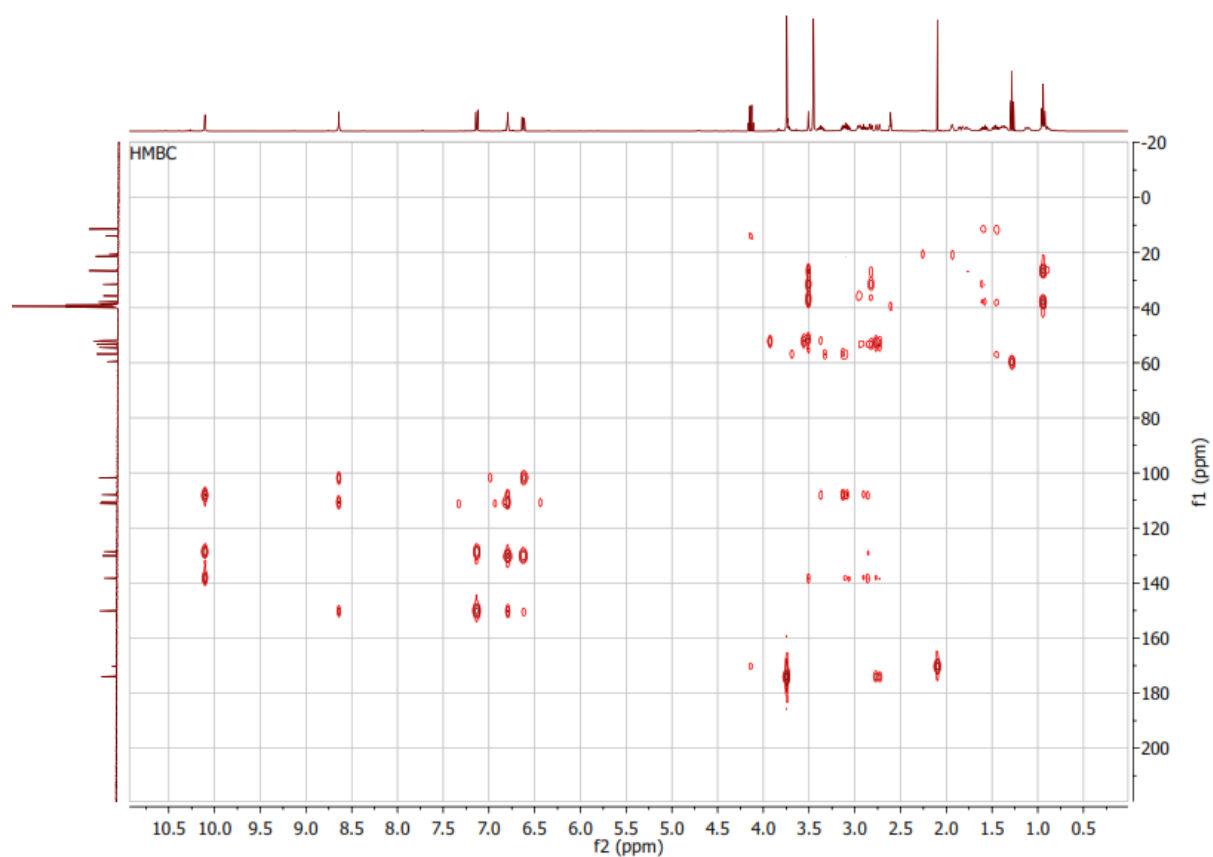

**Figure S16:** HMBC spectrum of **3** in MeOD

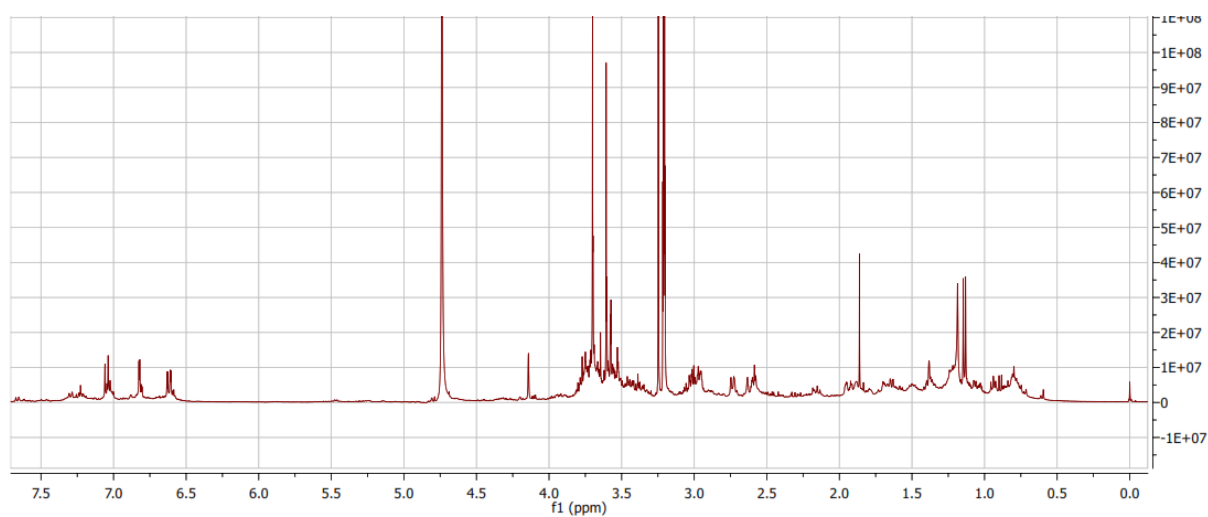

**Figure S17:**  $^1\text{H}$  NMR spectrum (500 MHz) of **4** in MeOD

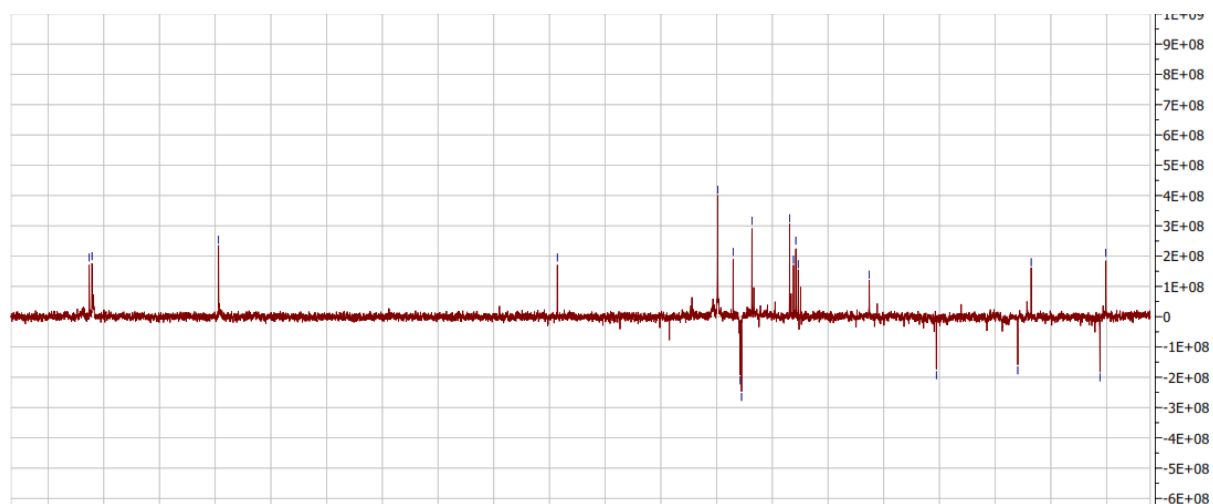

Figure S18: DEPT spectrum (125 MHz) of **4** in MeOD

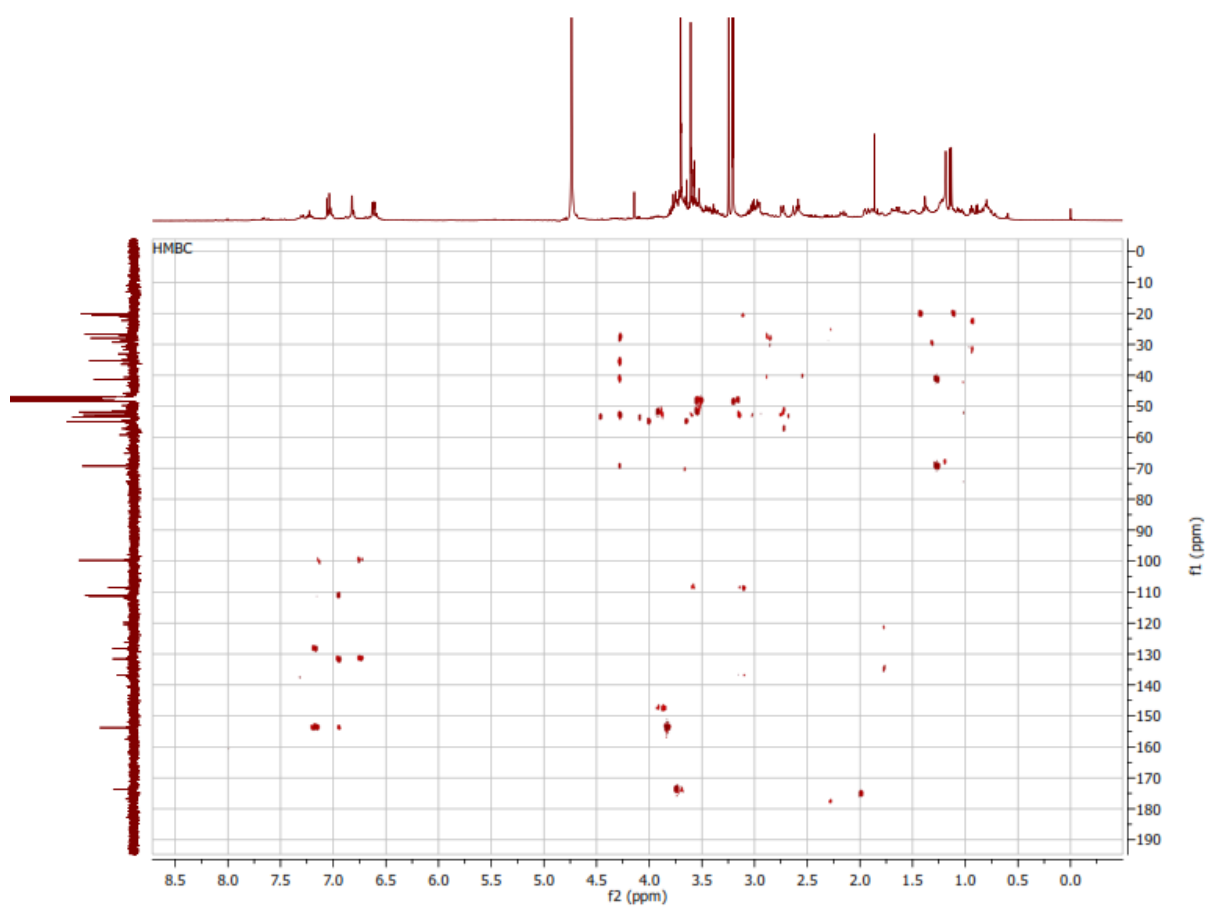

Figure S19: HMBC spectrum of **4** in MeOD

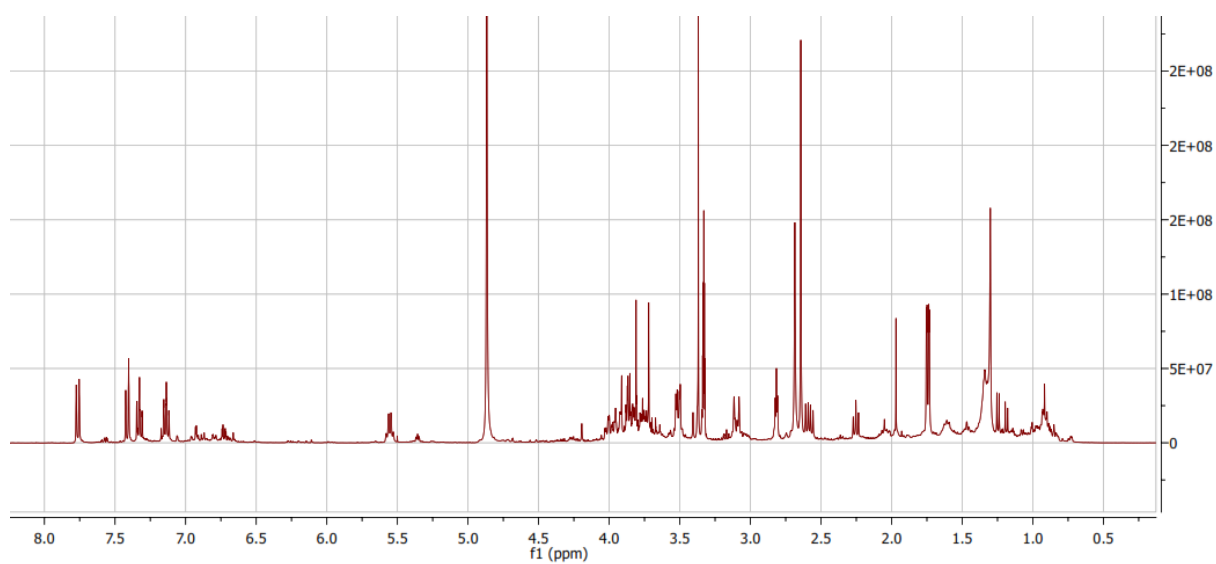

**Figure S20:**  $^1\text{H}$  NMR spectrum (500 MHz) of **5** in MeOD

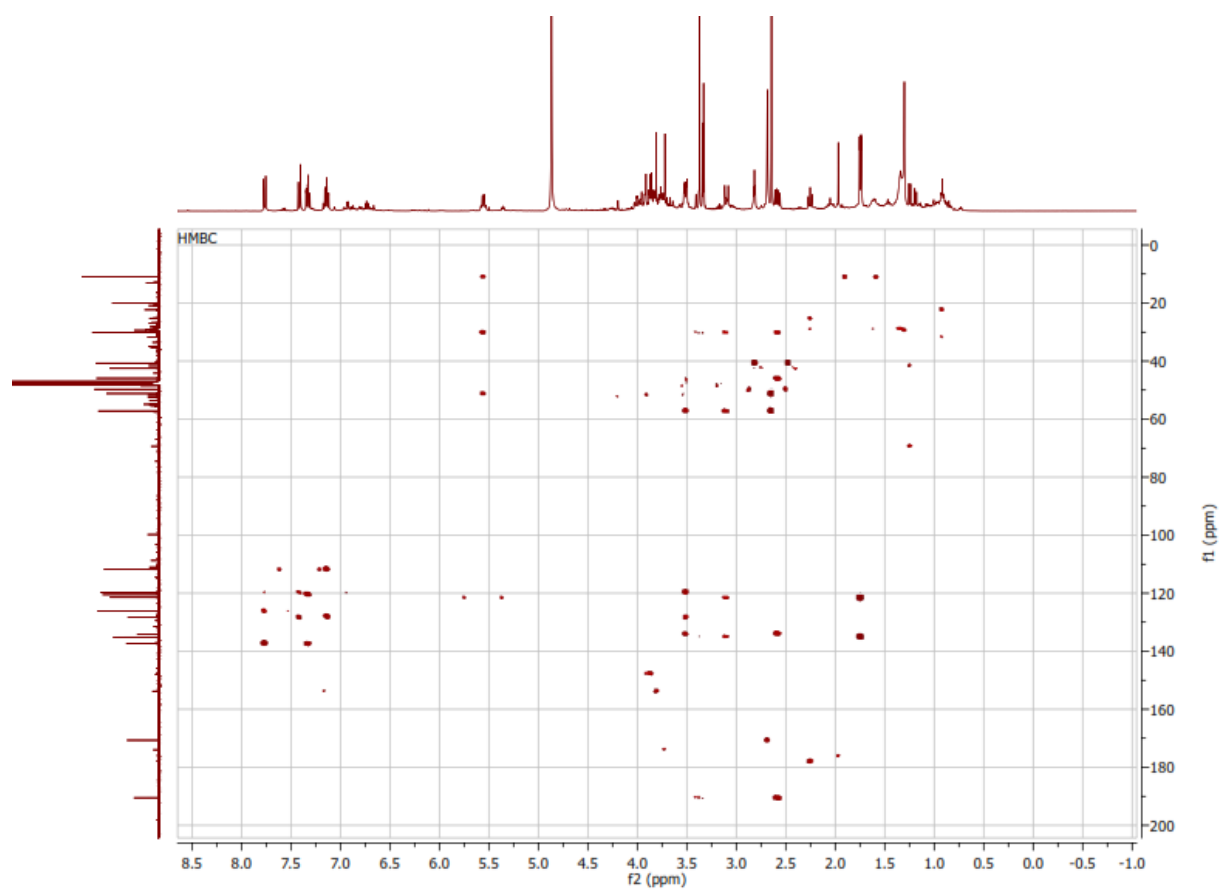

**Figure S21:** HMBC spectrum of **5** in MeOD

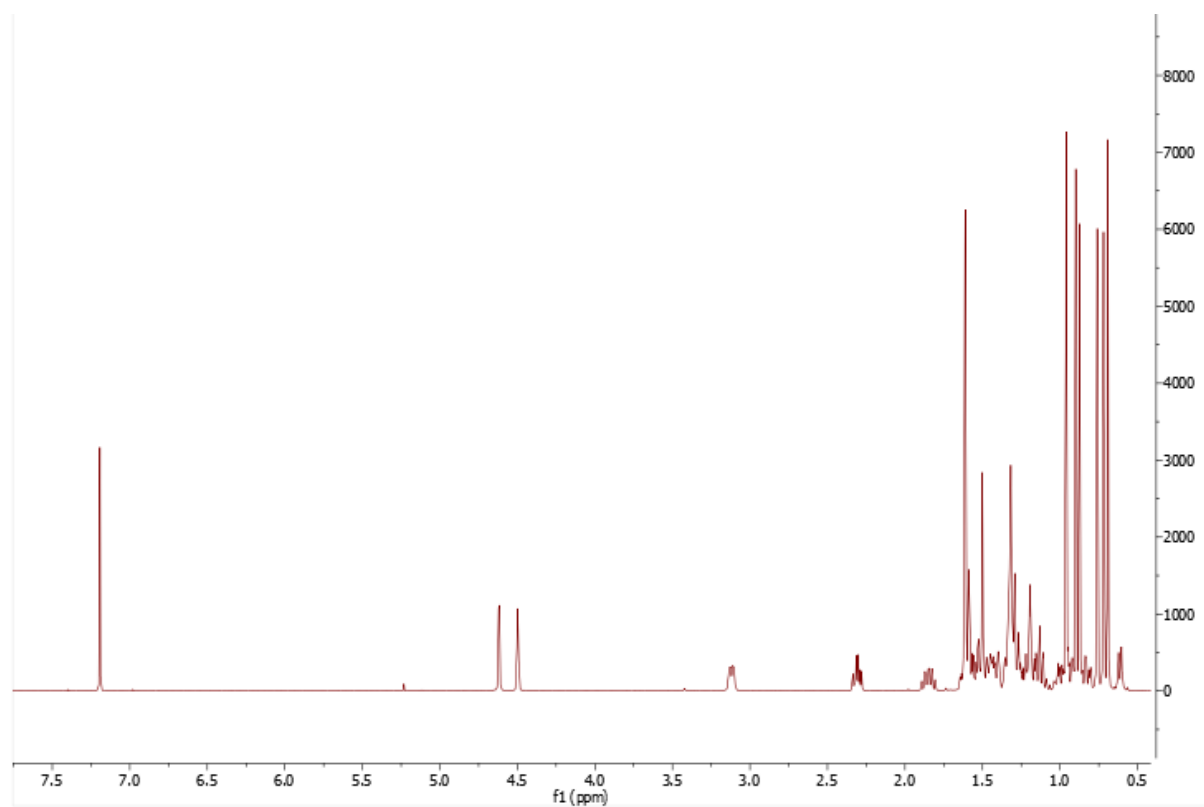

**Figure S22:** <sup>1</sup>H NMR spectrum (500 MHz) of **6** in CDCl<sub>3</sub>

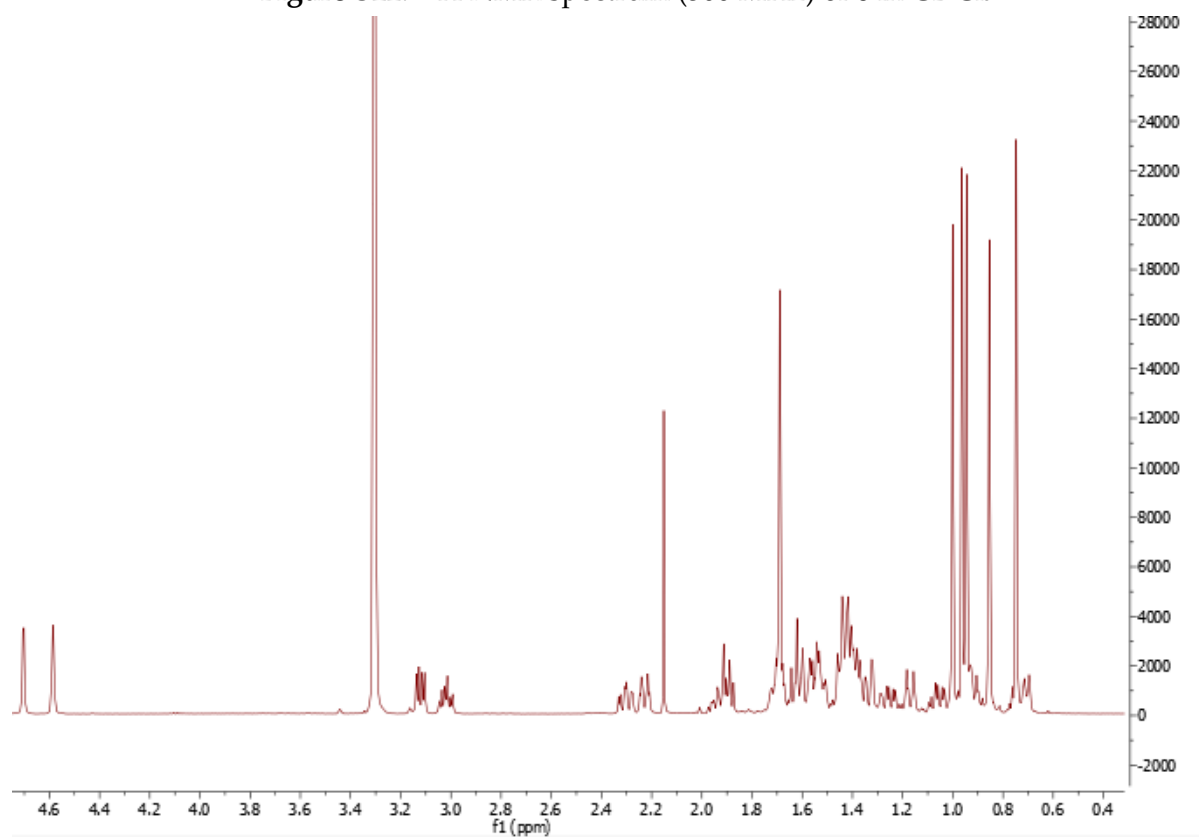

**Figure S23:** <sup>1</sup>H NMR spectrum (500 MHz) of **7** in MeOD

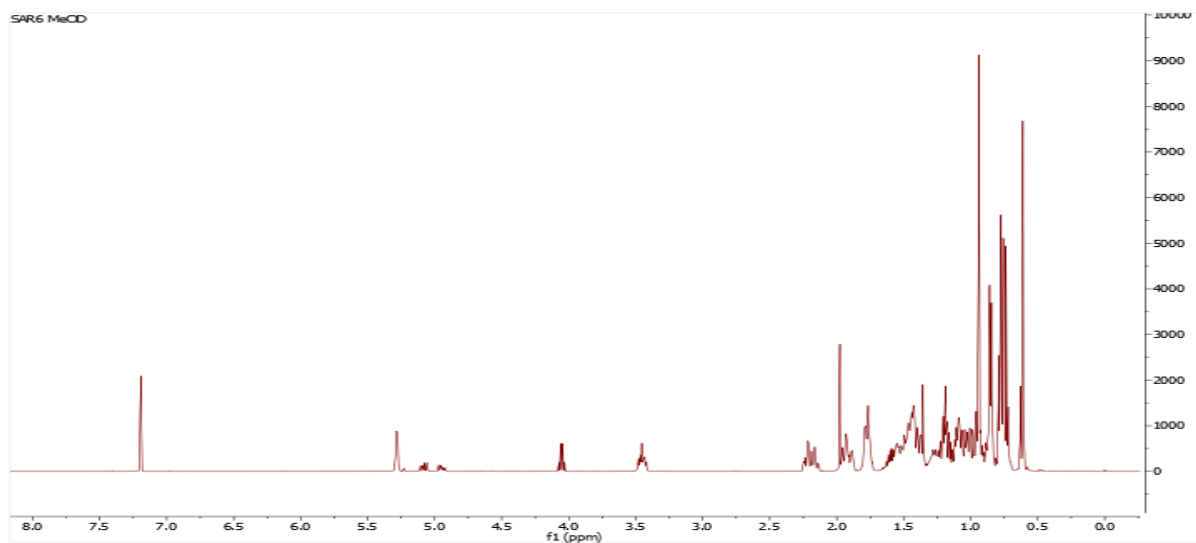

**Figure S24:**  $^1\text{H}$  NMR spectrum (500 MHz) of **8** and **10** in  $\text{CDCl}_3$

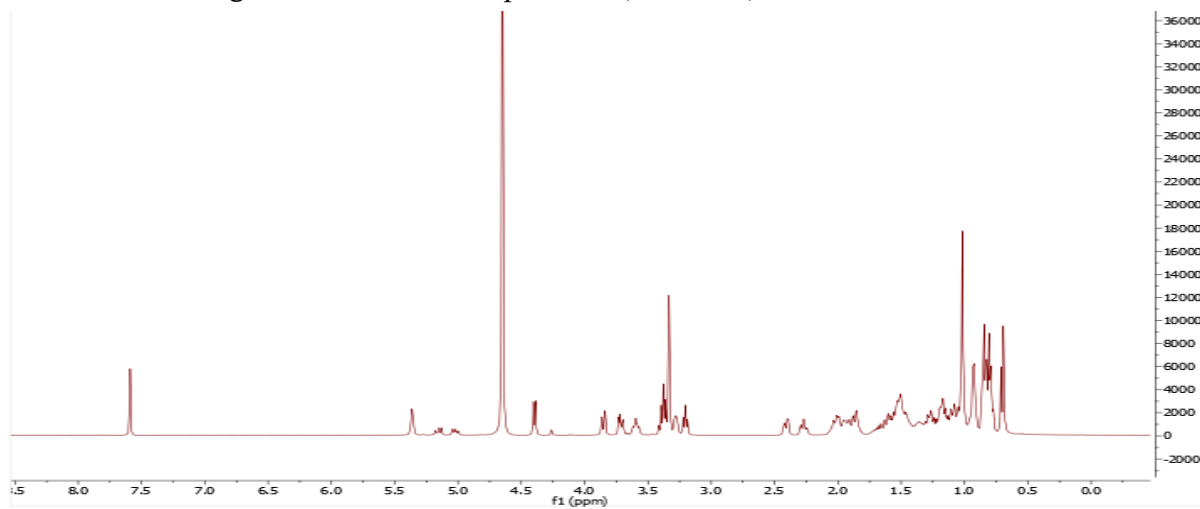

**Figure S25:**  $^1\text{H}$  NMR spectrum (500 MHz) of **9** in  $\text{CDCl}_3/\text{MeOD}$
